# Supplementary material for: Is This Within Reach? Left but Not Right Brain Damage Affects Affordance Judgment Tendencies
Source: Front Hum Neurosci. 2021 Jan 27;14:531893. doi: 10.3389/fnhum.2020.531893 (PMC7873490; doi:10.3389/fnhum.2020.531893)
Supplement: Supplementary file 2 [file Data_Sheet_1.xlsx]

## Sheet: Data
GroupNo	Group	ParticipantID	Gender	MSO	age	Responsetime_mean.Reach	Accuracy.Reach	Hitrate.Reach	FArate.Reach	d.Reach	c.Reach	AUC.Reach
1	CL	CL01	f		62	927.906	75.9259	0.98	0.54	1.95332	-1.07709	0.7
1	CL	CL02	f		59	1084.77	79.6296	0.97	0.42	2.08269	-0.83945	0.756
1	CL	CL03	m		55	1183.75	62.963	0.98	0.83	1.09958	-1.50396	0.575
1	CL	CL04	m		61	873.235	77.7778	0.98	0.5	2.05375	-1.02687	0.75
1	CL	CL06	m		66	1030.98	77.7778	0.98	0.5	2.05375	-1.02687	0.75
1	CL	CL07	m		63	1202.84	87.037	0.83	0.08	2.35924	0.225453	0.854
1	CL	CL08	m		64	1222.52	85.1852	0.98	0.33	2.49366	-0.806918	0.825
1	CL	CL11	m		56	2105.85	85.1852	0.83	0.13	2.08056	0.0861129	0.848
1	CL	CL13	f		69	643.86	62.963	0.98	0.83	1.09958	-1.50396	0.575
1	CL	CL14	m		60	953.34	61.1111	0.98	0.88	0.878762	-1.61437	0.55
1	CL	CL15	f		59	1335.55	88.8889	0.97	0.21	2.68721	-0.537186	0.856
1	CL	CL16	m		45	615	72.2222	0.98	0.63	1.7219	-1.1928	0.7
1	CL	CL18	f		76	1150.24	62.963	0.98	0.83	1.09958	-1.50396	0.575
1	CL	CL26	f		71	1747.4	79.6296	0.87	0.29	1.67978	-0.286503	0.792
1	CL	CL30	f		43	806.413	66.6667	0.77	0.46	0.839281	-0.319207	0.679
1	CR	CR01	m		77	1681.43	62.963	0.98	0.83	1.09958	-1.50396	0.575
1	CR	CR04	m		47	1415.41	81.4815	0.83	0.21	1.76059	-0.073872	0.798
1	CR	CR06	f		52	915.88	72.2222	0.97	0.58	1.6789	-1.04134	0.681
1	CR	CR08	m		45	1719.98	75.9259	0.98	0.54	1.95332	-1.07709	0.7
1	CR	CR09	f		62	1487.68	74.0741	0.97	0.54	1.78036	-0.990614	0.681
1	CR	CR10	m		67	1203.31	59.2593	0.98	0.92	0.648677	-1.72941	0.55
1	CR	CR12	f		68	1947.85	79.6296	0.97	0.42	2.08269	-0.83945	0.8
1	CR	CR18	m		71	907.56	62.963	0.98	0.83	1.09958	-1.50396	0.55
1	CR	CR21	f		68	1101.96	81.4815	0.97	0.38	2.18627	-0.787656	0.8
1	CR	CR22	m		66	1492.68	81.4815	0.98	0.42	2.25564	-0.925928	0.775
1	CR	CR25	m		71	1137.9	59.2593	0.97	0.88	0.705807	-1.52789	0.531
1	CR	CR26	f		77	955.735	70.3704	0.98	0.67	1.61384	-1.24683	0.675
1	CR	CR29	m		66	1080.85	70.3704	0.98	0.67	1.61384	-1.24683	0.675
1	CR	CR30	m		43	939.49	62.963	0.98	0.83	1.09958	-1.50396	0.575
2	LBD	LBD01	f	24	66	2309.06	79.6296	0.87	0.29	1.67978	-0.286503	0.798
2	LBD	LBD02	f	4	82	4144.37	70.3704	0.67	0.25	1.1144	0.117288	0.658
2	LBD	LBD03	m	29	56	1214.73	72.2222	0.93	0.54	1.37536	-0.788112	0.712
2	LBD	LBD04	m	89	67	1582.02	81.4815	0.7	0.04	2.27509	0.613143	0.821
2	LBD	LBD06	m	67	66	2845.58	77.7778	0.83	0.29	1.50755	-0.20039	0.754
2	LBD	LBD07	m	20	67	1775.94	74.0741	0.77	0.29	1.29223	-0.0927311	0.765
2	LBD	LBD08	m	116	61	1914.44	75.9259	0.98	0.54	1.95332	-1.07709	0.725
2	LBD	LBD14	m	12	62	1162.71	70.3704	0.98	0.67	1.61384	-1.24683	0.65
2	LBD	LBD15	f	28	56	1016	70.3704	0.53	0.08	1.48034	0.664901	0.738
2	LBD	LBD18	f	0.5	70	1169.78	66.6667	0.98	0.75	1.37926	-1.36412	0.65
2	LBD	LBD20	f	3	63	1019.18	74.0741	0.67	0.17	1.39408	0.257126	0.746
2	LBD	LBD21	f	2	63	2281.88	68.5185	0.53	0.13	1.20166	0.525561	0.681
2	LBD	LBD22	f	0.5	32	1603.18	74.0741	0.7	0.21	1.33082	0.14101	0.746
2	LBD	LBD24	m	0.75	43	2040.82	59.2593	0.97	0.88	0.705807	-1.52789	0.531
2	LBD	LBD26	f	0.5	74	4379.07	51.8519	0.2	0.08	0.56345	1.12335	0.565
2	LBD	LBD27	f	0.25	79		75.9259	0.98	0.54	1.95332	-1.07709	0.7
2	LBD	LBD28	m	0.5	55	912.787	74.0741	0.63	0.13	1.45824	0.397269	0.752
3	RBD	RBD01	m	0	84	1356.35	53.7037	0.93	0.96	-0.274895	-1.61324	0.487
3	RBD	RBD02	m	0	65	1055.75	62.963	0.98	0.83	1.09958	-1.50396	0.6
3	RBD	RBD03	m	5	61	1129.96	61.1111	0.93	0.79	0.66937	-1.14111	0.562
3	RBD	RBD04	m	7	52	3274.34	66.6667	0.5	0.13	1.12639	0.563196	0.719
3	RBD	RBD06	f	28	37	1206.69	66.6667	0.98	0.75	1.37926	-1.36412	0.625
3	RBD	RBD07	m	4	79	2937.68	64.8148	0.98	0.79	1.24733	-1.43009	0.575
3	RBD	RBD08	m	72	45	2169.78	53.7037	0.17	0.02	1.09958	1.50396	0.577
3	RBD	RBD10	m	3	65	3222.38	87.037	0.87	0.13	2.25278	0	0.848
3	RBD	RBD17	f	13	41	1612.88	70.3704	0.63	0.21	1.13827	0.237284	0.727
3	RBD	RBD18	m	134	73	891.295	75.9259	0.98	0.54	1.95332	-1.07709	0.725
3	RBD	RBD19	f	0.25	80	4376	62.963	0.83	0.63	0.622312	-0.643009	0.592
3	RBD	RBD21	f	4	70	2431.02	81.4815	0.97	0.38	2.18627	-0.787656	0.806
3	RBD	RBD22	m	8	68	2925.79	72.2222	0.98	0.63	1.7219	-1.1928	0.675
3	RBD	RBD24	m	19	62	1057.94	70.3704	0.98	0.67	1.61384	-1.24683	0.65
3	RBD	RBD25	m	0.5	71	1952.84	79.6296	0.83	0.25	1.62866	-0.139838	0.773
3	RBD	RBD26	f	5	75	2760.32	74.0741	0.57	0.04	1.92706	0.787156	0.744
3	RBD	RBD29	m	5	68	615.653	55.5556	0.98	0.98	0	-2.05375	0.5
